# Supplementary material for: Concurrent profiling of polar metabolites and lipids in human plasma using HILIC-FTMS
Source: PubMed Central journal article supplement (PMC5098236; doi:10.1038/srep36490), 2016-11-07
Supplement: srep36490-s1.pdf [file srep36490-s1.pdf]

## Supplementary Information:

### Concurrent profiling of polar metabolites and lipids in human plasma using HILIC-FTMS

Xiaoming Cai<sup>‡, ¶</sup>, Ruibin Li<sup>†, ⊥, \*</sup>

<sup>‡</sup> College of Pharmaceutical Science, Soochow University, Suzhou, 215123, China;

<sup>†</sup> School for Radiological and Interdisciplinary Sciences (RAD-X), Collaborative Innovation Center of Radiation Medicine of Jiangsu Higher Education Institutions, Soochow University, Suzhou 215123, China;

<sup>¶</sup> Department of Pharmacology, University of California, Irvine, Irvine, CA 92697, United States;

<sup>⊥</sup> Division of NanoMedicine, Department of Medicine, University of California, Los Angeles, CA 90095, United States

\*Corresponding author: Ruibin Li, Ph.D.

Department of Medicine, Division of NanoMedicine, UCLA School of Medicine, 52-175 CHS, 10833 Le Conte Ave, Los Angeles, CA 90095-1680.

Tel: (310) 983-3359, Fax: (310) 206-8107

E-mail: [liruibin@ucla.edu](mailto:liruibin@ucla.edu)

## Tables

**Table S1. Criteria for the selection of voluntary participants**

| <b>Characteristics</b>    | <b>Smokers</b>            | <b>Non-smokers</b>        |
|---------------------------|---------------------------|---------------------------|
| Age                       | 18-31                     | 18-31                     |
| Gender                    | Male                      | Male                      |
| BMI (kg/m <sup>2</sup> )  | 18-25                     | 18-25                     |
| Race                      | White American            | White American            |
| Medical history           | Healthy                   | Healthy                   |
| Consumption of cigarette  | ≥30 per day               | 0                         |
| Medication usage          | No medication for 2 weeks | No medication for 2 weeks |
| Exercise                  | 5-10 hours per week       | 5-10 hours per week       |
| Consumption of vegetables | 2-5 kg per week           | 2-5 kg per week           |
| Consumption of Meat       | 1-3 kg per week           | 1-3 kg per week           |
| Consumption of Fish       | 0.1-1 kg per week         | 0.1-1 kg per week         |

**Table S2. Potential structures of candidate smoking-related biomarkers**

| <b>m/z</b> | <b>RT<br/>(min)</b> | <b>Somker vs<br/>non-smoker</b> | <b>Potential structure</b>            | <b>Mass difference<br/>( ppm)</b> |
|------------|---------------------|---------------------------------|---------------------------------------|-----------------------------------|
| 177.10250  | 7.57                | ↑                               | Cotinine                              | 1.47                              |
| 193.09743  | 7.81                | ↑                               | Hydroxycotinine                       | 1.43                              |
| 206.10111  | 14.71               | ↓                               | 2-Acetamido-2,6-<br>dideoxy-D-glucose | 5.77                              |
| 256.17586  | 7.66                | ↓                               | Arginyl-Valine                        | 5.78                              |
| 482.32677  | 14.42               | ↑                               | LysoPE (18:0)                         | 5.54                              |
| 585.27188  | 10.21               | ↓                               | Bilirubin                             | 2.03                              |
| 758.56979  | 14.68               | ↑                               | PC (34:2)                             | 0.47                              |
| 759.57495  | 14.69               | ↑                               | Isotope of PC (34:2)                  | N/A                               |
| 760.58520  | 18.73               | ↑                               | PC (34:1)                             | 0.16                              |
| 760.58550  | 16.76               | ↑                               | Isomer of PC (34:1)                   | 0.55                              |
| 766.57954  | 14.51               | ↑                               | PC (O-36:5)                           | 6.55                              |
| 767.58369  | 14.51               | ↑                               | Isotope of PC (O-36:5)                | N/A                               |
| 772.59002  | 14.64               | ↑                               | PE (38:2)                             | 6.39                              |
| 773.59317  | 14.66               | ↑                               | Isotope of PE (38:2)                  | N/A                               |
| 786.60373  | 14.64               | ↑                               | PC (36:2)                             | 3.81                              |
| 787.60868  | 14.64               | ↑                               | Isotope of PC (36:2)                  | N/A                               |
| 788.61027  | 14.64               | ↑                               | Isotope of PC (36:2)                  | N/A                               |
| 794.61075  | 14.53               | ↑                               | PC (O-38:5)                           | 6.21                              |
| 795.61000  | 14.54               | ↑                               | Isotope of PC (O-38:5)                | N/A                               |
| 813.68729  | 14.97               | ↑                               | SM(d42:2)                             | 3.55                              |
| 832.59241  | 14.52               | ↑                               | PC (40:7)                             | 8.80                              |
| 836.62307  | 14.57               | ↑                               | PC (40:5)                             | 8.00                              |
| 852.56631  | 12.95               | ↑                               | PI (34:2)                             | 7.81                              |
| 880.59712  | 13.00               | ↑                               | PI (36:2)                             | 7.00                              |
| 904.59776  | 13.07               | ↑                               | PI (38:4)                             | 7.53                              |

## Figures

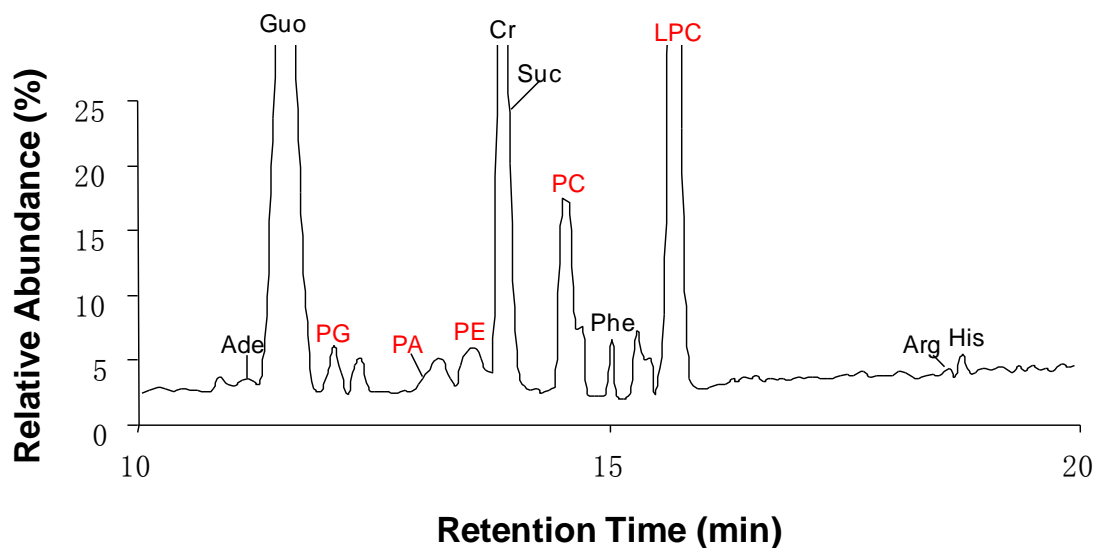

**Figure S1** Amplified total ion chromatograms (from 10 min to 20 min) of the standard mixture of 7 polar metabolites and 5 polar lipids on Silica HILIC. Ade: adenine; Guo: guanosine; Cr: creatinine; Arg: L-Arginine ; His: L-histidine; Phe: L-phenylalanine; Suc: sucrose; LPC: LPC (17:0); PC: PC (17:0/17:0); PE: PE (17:0/17:0); PA: PA (17:0/17:0); PG: PG (17:0/17:0).
